# Supplementary material for: Temporal dynamics of spinal cord repair in juvenile and adult zebrafish
Source: Research Square preprint supplement (doi:10.21203/rs.3.rs-6524675/v1), 2025-05-14
Supplement: Supplementary file 1 [file 18c5ebe66dd5f02c5d2bde2c.docx]

**Supplemental Table 1. List of primers used.**

| **Gene** | **Primer** | **Sequence** | **Reference Paper** |
| --- | --- | --- | --- |
| *il-1β* | Forward | 5’-ATG GCG AAC GTC ATC CAA GA-3’ | Tsarouchas *et al.,* 2018 |
| Reverse | 5’-GAG ACC CGC TGA TCT CCT TG-3’ |
| *il-8* | Forward | 5’-GTC GCT GCA TTG AAA CAG AA-3’ | Kyritsis *et al.,* 2012 |
| Reverse | 5’-AGG GGT CCA GAC AGA TCT CC-3’ |
| *tgf-β1a* | Forward | 5’-GCT GTA TGC GCA AGC TTT ACA-3’ | Tsarouchas *et al.,* 2018 |
| Reverse | 5’-GGA CAA TTG CTC CAC CTT GTG-3’ |
| *tgf-β3* | Forward | 5’-AAA ACG CCA GCA ACC TGT TC-3’ | Tsarouchas *et al.,* 2018 |
| Reverse | 5’-CCT CAA CGT CCA TCC CTC TG-3’ |
| *β actin* | Forward | 5’-CTC TTC CAG CCT TCC TTC CT-3’ | Sun *et al.,* 2020 |
| Reverse | 5’-CTT CTG CAT ACG GTC AGC AA-3’ |

Tsarouchas TM, Wehner D, Cavone L, Munir T, Keatinge M, Lambertus M, et al. Dynamic control of proinflammatory cytokines Il-1β and Tnf-α by macrophages in zebrafish spinal cord regeneration. Nat Commun. 2018; 9:4670. <https://doi.org/10.1038/s41467-018-07036-w>

Kyritsis N, Kizil C, Zocher S, Kroehne V, Kaslin J, Freudenreich D, et al. Acute inflammation initiates the regenerative response in the adult zebrafish brain. Science. 2012; 338:1353–1356. <https://doi.org/10.1126/science.1228773>

Sun L, Ling Y, Jiang J, Wang D, Wang J, Li J, et al. Differential mechanisms regarding triclosan vs. bisphenol A and fluorene-9-bisphenol induced zebrafish lipid-metabolism disorders by RNA-Seq. Chemosphere. 2020; 251:126318. <https://doi.org/10.1016/j.chemosphere.2020.126318>


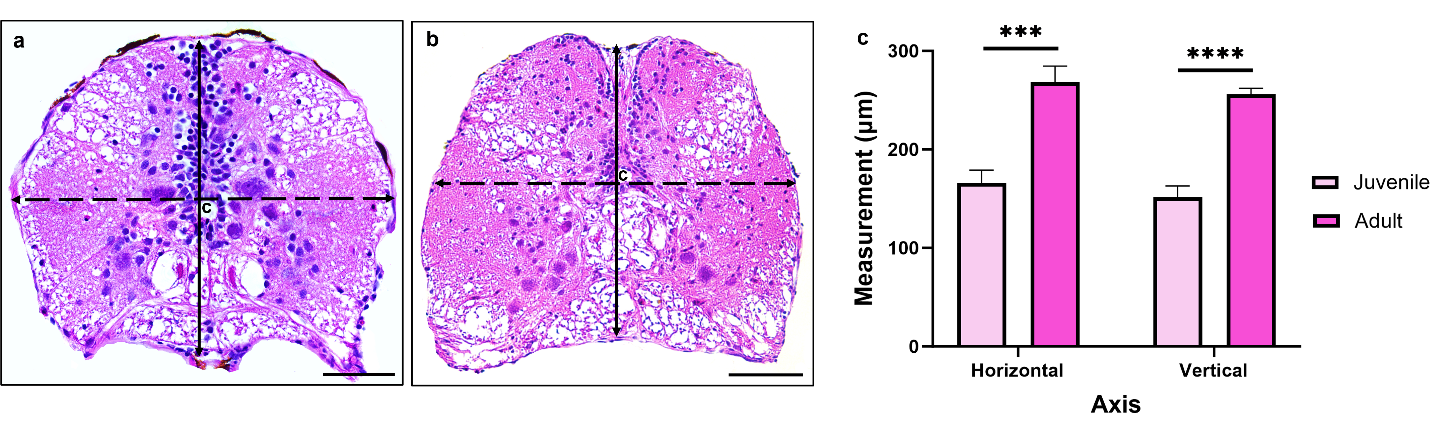


**Supplemental Fig. 1** Comparison of horizontal and vertical axes between juvenile and adult spinal cords. **a-b** Hematoxylin and Eosin (H&E) cross-sections of juvenile (**a**) and adult (**b**) uninjured spinal cord showing measurements of the horizontal and vertical axes taken at level of the central canal (c). **c** Comparison of horizontal and vertical spinal cord axes between juvenile and adult zebrafish. n = 10 animals/group measured. Statistics: Independent samples t-test. ****p* <0.001, *****p* <0.0001. Scale bars: (**a**) 50 µm, (**b**) 75 µm.
